# Supplementary material for: Mucin-mediated nanocarrier disassembly for triggered uptake of oligonucleotides as a delivery strategy for the potential treatment of mucosal tumours
Source: Royal Society of Chemistry journal article supplement (doi:10.1039/c5nr07206a), 2015-12-22
Supplement: c5nr07206a1.pdf [file c5nr07206a1.pdf]

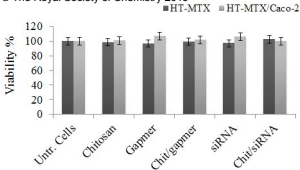

**Supplementary figure 1** Cell viability of differentiating HT-MTX mono-cultures and HT-MTX/Caco-2 co-cultures after 24h treatment with gapmer (100nM), chitosan/gapmer (N:P60), siRNA (100nM) and chitosan/siRNA (N:P60) measured using a LDH assay.
